# Supplementary material for: Sequential assimilation of satellite-derived vegetation and soil moisture products using SURFEX_v8.0: LDAS-Monde assessment over the Euro-Mediterranean area
Source: Copernicus journal article supplement (doi:10.5194/gmd-2017-121), 2017-05-30

## RESPONSE TO REVIEWER #2

***“In the paper "Sequential assimilation of satellite-derived vegetation and soil moisture products using SURFEX\_v8.0: LDAS-Monde assessment over the Euro-Mediterranean area", the authors are motivated "to increase monitoring accuracy" of land surface variables such as soil moisture (SM) and leaf area index (LAI) over the European Mediterranean region. They use a global Land Surface Assimilation system called "LDAS-Monde" to assimilate both SM and LAI in experiments to assess the effects on the model land surface variables. The model results are compared to independent observations of river discharge, land evapo-transpiration and different agricultural statistics and measures. I recommend that this paper undergo major revisions.[...]"***

The authors thank anonymous Reviewer 2 for his/her review of the manuscript and for the fruitful comments. Responses to the Reviewer 2 are structured as follow: (1) 2.X: comments from Reviewer 2, (2) Response to 2.X: author's response and author's changes in manuscript when any. For sake of clarity, line and page numbering from the first submission is used.

**2.1 [The last few sections are not clearly organised or written. The abstract and introduction are very clear about the purpose of the paper, however, the sections from 3.4 onwards lack clarity and do not lead the reader to a direct interpretation of the results as stated in the abstract. The reader would have difficulty coming to the conclusions that are put forward in the abstract. I recommend that these sections be carefully re-written.]**

Response to 2.1

Agreed, section 3.4 on evaluation of the analysis impact as well as the discussion section were carefully re-written, according to Reviewer #2 comment 2.1 but also to comments 2.3 to 2.5, 2.7 and 2.8. Responses to technical corrections (see Responses to comments 2.32 to 2.54) also helped re-writing section 3.4 onwards. Should a revised version of this paper be accepted in GMD, a copy editing work will be performed.

Section 3.4 (L.493-544) is now:

***“First, the evaluation of the analysis impact is effectuated over France using straw cereal grain yield (GY) values from the Agreste French agricultural statistics portal. Only the ‘département’ administrative units corresponding to a high proportion of straw cereals are considered. Yearly maximal above ground biomass ( $B_{ag}$ ) values from the open-loop and analysis are compared to GY over 2000-2010. Yearly-scaled anomalies from the mean and the standard deviation for observations, open-loop (i.e model) and analysis are used for 45 sites over France as in Dewaele et al. (2017). Error! Reference source not found.a and 10b present correlations and RMSD values, respectively and Error! Reference source not found.c time-series for one site illustrating the inter-annual variability. After assimilation of SSM and LAI, correlation as well as RMSD between  $B_{ag}$  and GY is clearly improved for 43 and 41 sites, respectively, out of 45 sites showing the added value of the analysis compared to the open-loop. Error! Reference source not found.c presents  $B_{ag}$  from the open-loop (black dashed line) and analysis (black solid line) as well as observed GY (red solid line) scaled anomaly times-series for one site in Allier, France (46.09°N-3.21°E). Correlations and RMSD for open-loop and analysis experiments are 0.45 and 0.99, 0.78 and 0.63, respectively.***

***Over 2000-2010, 48 of 83 gauge stations present  $Eff$  values greater than 0 and 22 gauge stations report  $Eff$  greater than 0.5. As suggested in the previous section, the analysis impact on river discharge is rather small. If the analysis generally leads to an improvement in river discharge representation, only 8 stations present an  $Eff$  increase greater than 0.05 (3 stations report a decrease greater than 0.05).  $Eff$ ,  $R$  and RMSD histograms of differences are presented in Error! Reference source not found.(b, c and d) along with a hydro-graph (Fig.11a) for the Loire River in***

*France (47.25°N, 1.52°W). Although the assimilation impact is relatively small, evaluation results suggest that they are neutral to positive. Analysis impact on other CTRIP variables (e.g., floodplain fraction and storage, groundwater height) is rather neutral.*

*Evapotranspiration from both the open-loop and the analysis are compared to monthly values of GLEAM satellite-derived estimates over 2000-2012 for vegetated grid points (>90%). As for the river discharge, the assimilation impact on evapotranspiration is small. However the comparison with the GLEAM satellite-derived estimates is rather positive, as illustrated in Error! Reference source not found. representing evapotranspiration from the open-loop (Fig.12a) , GLEAM estimates (Fig.12b), the analysis (Fig.12c) and their differences (Fig.12d). Open-loop simulation of evapotranspiration tends to over-estimate the GLEAM product over most of Europe, particularly over France and the Iberian Peninsula, North Africa. Analysis is able to reduce this bias (Error! Reference source not found.d). Figure 14 shows maps of RMSD (Fig.14a) and correlations (Fig.14b) differences: scores between the analysis and the GLEAM estimates minus scores between the open-loop and the GLEAM estimates. Most of the pixels present negative values for differences in RMSD (76% fig.14 a) indicating that for those pixels RMSDs from the analysis are smaller than those from the open-loop. Most of the pixels present positive values for differences in correlations (80% fig.14 b) indicating that for those pixels correlations from the analysis are higher than those from the open-loop. It shows the added value of the analysis when compared to the open-loop. Evapotranspiration from the open-loop and analysis has also been evaluated using FLUXNET-MTE estimates of evapotranspiration (2000-2011). Results are illustrated by Figure 12e to h and Figure 14e and f. They are similar of those obtained using GLEAM estimates: over the whole domain most of the pixels present negative values for differences in RMSD (70%), most of the pixels present positive values for differences in correlation (79%).*

*As for evapotranspiration, GPP from both the open-loop and the analysis are compared to monthly GPP estimates from FLUXNET-MTE dataset. Error! Reference source not found. illustrates averaged carbon uptake by GPP over land for 2000-2011 from the open-loop (Fig.13a), FLUXNET-MTE (Fig.13b) and the analysis (Fig.13c) as well as differences between the analysis and the model (Fig.13d). Also, Figures 14 c) and d) show RMSD and correlation differences between the open-loop or the analysis and FLUXNET-MET dataset (analysis minus open-loop). Finally Figure 15 presents seasonal scores over the same period (fig. 15a: RMSD values and fig. 15b: Correlation values). Compared to the FLUXNET-MTE estimates, the open-loop tends to underestimate GPP over the Scandinavian countries, the northwestern part of France, UK and Ireland, north of the Caspian Sea while an overestimation is visible over most of the Iberian peninsula, Eastern Europe as well as the north-eastern part of the domain (Figure 14, a, b). From Figures 14 d) and e) and Figure 15 one may notice that after assimilation of SSM and LAI there is a clear improvement in the GPP representation for RMSD and correlation with a systematic seasonal decrease and increase of the scores, respectively. Over the whole domain, 79% and 90% of the grid points present better RMSD and correlation values, respectively, after assimilation with respect to the FLUXNET-MTE estimates of GPP.”*

**2.2 [The title includes acronyms that should be spelled out in full if they really need to be used at all. Not everyone is familiar with the acronym "LDAS" or "SURFEX". Is it necessary to put a specific version number of "SURFEX" in the title?]**

Response to 2.2

Global Model Development journal (GMD) proposes different manuscript types including Model Description Paper where it is a requirement to give the model name and version number (or other unique identifier) in the title, please see:

[https://www.geoscientific-model-development.net/about/manuscript\\_types.html#item5](https://www.geoscientific-model-development.net/about/manuscript_types.html#item5)

Although our manuscript has been submitted as a Model Evaluation Paper, and because it is part of the SURFEX special issue we find it useful to indicate the specific version number of the SURFEX modelling platform.

**2.3 [In many places the RMSD and correlations computed are discussed in the same sentence and this creates confusion. It would be simpler to have two or more shorter sentences that are more explicit about which measure is being used for the comparison. I think that overall the authors have chosen brevity over clarity.]**

Response to 2.3

Agreed, the considered sections (mainly sections 3.1 and 3.4) has been revised, please see Response to comments 2.1, 2.5 and 2.32.

**2.4 [Also, the sign (positive or negative) of a change in the metric used is given without explaining what the change means in terms of the variables or the models. A physical interpretation of such results would be helpful.]**

Response to 2.4

Agreed, Authors believe that Reviewer #2 refers to the description of figure 13 (now figure 14) it has been revised, please see also Response to comments 2.1 and 2.5.

It is now: *“Figure 14 shows maps of RMSD (Fig.14a) and correlations (Fig.14b) differences: scores between the analysis and the GLEAM estimates minus scores between the open-loop and the GLEAM estimates. Most of the pixels present negative values for differences in RMSD (76% fig.14 a) indicating that for those pixels RMSDs from the analysis are smaller than those from the open-loop. Most of the pixels present positive values differences in correlations (80% fig.14 b) indicating that for those pixels correlations from the analysis are higher than those from the open-loop. It shows the added value of the analysis when compared to the open-loop. Evapotranspiration from the open-loop and analysis has also been evaluated using FLUXNET-MTE estimates of evapotranspiration (2000-2011). Results are illustrated by Figure 12e to h and Figure 14e and f. They are similar of those obtained using GLEAM estimates: over the whole domain most of the pixels present negative values for differences in RMSD (70%), most of the pixels present positive values for differences in correlation (79%).”*

**2.5 [Please rewrite the sentence in 535-536 "Most of the differences in RMSD are negative..." RMSD is a strictly positive or zero value. Are the differences in RMSD between two different data sets being compared? Could the authors please write two sentences that explain this point more explicitly? It appears to be an important point as it is going to "show the added value of the analysis".]**

Response to 2.5

Agreed, the whole paragraph has been revised for a better understanding. It is now: *“However the comparison with the GLEAM satellite-derived estimates is rather positive, as illustrated in Error! Reference source not found. representing evapotranspiration from the open-loop (Fig.12a) , GLEAM estimates (Fig.12b), the analysis (Fig.12c) and their differences (Fig.12d). Open-loop simulation of evapotranspiration tends to over-estimate the GLEAM product over most of Europe, particularly over France and the Iberian Peninsula, North Africa. Analysis is able to reduce this bias (Error! Reference source not found.d). Figure 14 shows maps of RMSD (Fig.14a) and correlations (Fig.14b) differences: scores between the analysis and the GLEAM estimates minus scores between the open-loop and the GLEAM estimates. Most of the pixels present negative values for differences in RMSD (76% fig.14 a) indicating that for those pixels RMSDs from the analysis are smaller than those from the open-loop. Most of the pixels present positive values for differences in correlations (80% fig.14 b) indicating that for those pixels correlations*

*from the analysis are higher than those from the open-loop. It shows the added value of the analysis when compared to the open-loop.”*

**2.6 [The figures (details are given in the technical comments below) need work as well. For example, in Figure 8: What is N? You don't really need a legend for the red and green lines on each of the 6 month plots. Just define this in the caption. Panels need labels a, b,c and they need to be referenced as such in the caption. Please label the x axis with variable name and units. Most importantly, the y-axis is not a probability but a frequency of occurrence (the caption even says "histogram" which is correct). The integral of the probability distribution function should be equal to one by definition.]**

#### **Response to 2.6**

Agreed, figures have been improved accordingly. Please see also Responses to technical comments 2.56 to 2.68. Regarding the y-axis of figure 8, it should be labelled 'Probability density', it represents the counts normalized to form a probability density, i.e., the area (or integral) under the histogram will sum to 1. This is achieved dividing the count by the number of observations times the bin width and not dividing by the total number of observations. Y-labels on figures 4, 8 and 11 (b, c and d) are now 'Probability density'.

**2.7 [The last two paragraphs of section 3.4 are very unclear. The sentence "From Figures 13 d and e and Figure 13 one may notice...seasonal decrease and increase of the scores." does not make sense. Perhaps the authors need several sentences here that are more precise about which figures support which conclusions. Again, the RMSD and correlation should be discussed separately to make the evidence clearer. Line 555 contains another confusing sentence. "differences in RMSD and correlations are negative and positive: 70% and 79%. This just doesn't make any sense. Are there percent changes in a particular direction? If so, what are the implications for the model output or the physical system?]**

#### **Response to 2.7**

Agreed, the considered section (section 3.4) has been revised, please see Response to comments 2.1 and 2.5 as well.

**2.8 [Section 4.1 is called "Can different data assimilation techniques improve the analysis?" I don't believe that this particular question has been answered in this section by the work presented here. I think that alternative methods are proposed and discussed but the actual results in the paper do not answer the question whether one techniques is better than another. If the section could be renamed, that would be more clear.]**

#### **Response to 2.8**

Agreed, section 4.1 has been renamed, it is now: "*Towards different data assimilation techniques to improve the analysis*"

**2.9 [Abstract: SM is defined but later in the main body SSM is used. Perhaps should just define SSM in abstract and stick to it?]**

#### **Response to 2.9**

Agreed, SSM is now defined from the abstract.

**2.10 [Introduction: Define acronyms MODCOU and SAFRAN]**

#### **Response to 2.10**



Agreed, both acronyms are in French, MODCOU stands for: “MODèle COUplé” , SAFRAN stands for: “Système d’Analyse Fournissant des Renseignements Atmosphériques à la Neige”.

## **2.11 [Section 3.1 Should be "Consistency between the model and observations"]**

Response to 2.11

Agreed.

## **2.12 [Need to state what is consistent with what. "Observations consistency over time..." is not clear. Do you mean that one set of observations are consistent with another observation set? or with the model output?]**

Response to 2.12

Those dataset have been evaluated/compared against long term in situ measurements/re-analysis of soil moisture and LAI with no decrease of quality over time. That is what authors mean by ‘*consistency over time*’. For instance, Albergel et al., 2013a have compared the ESA CCI soil moisture product against the ERA-Interim/Land re-analysis over 1979-2010 for all the 3-yr periods within 1979-2010. Correlations values were found rather stable with a small increase over time. Also time-series do not present any spurious jumps or drifts.

In the context of our evaluation and for sake of clarity, it is now emphasise that the data-set consistency against the open-loop is evaluated: “*Observations consistency over time is crucial when assimilating long-term datasets. Several authors assessed the consistency of the ESA CCI soil moisture product with respect to re-analysis products (e.g., Loew et. al., 2013; Albergel et. al., 2013a; 2013b) and in-situ measurements (Dorigo et. al., 2015, 2017). [...] To verify the results from literature for the spatial and temporal domain considered in this study a consistency evaluation both for SSM and LAI has been performed*” Is now: “*Consistency over time is crucial when assimilating long-term datasets. Several authors assessed the consistency of the ESA CCI soil moisture product with respect to re-analysis products (e.g., Loew et. al., 2013; Albergel et. al., 2013a; 2013b) and in-situ measurements (Dorigo et. al., 2015, 2017). [...] To verify the results from literature for the spatial and temporal domain considered in this study a consistency evaluation both for SSM and LAI against the open-loop experiment has been performed*”.

## **2.13 [lines 61-63: should read "perform best for plant productivity...to used soil moisture and vegetation observations together to improve..."]**

Response to 2.13

Agreed.

## **2.14 [line 91: WFDEI is defined in section 2 but should be defined here as well or instead of section 2.]**

Response to 2.14

Agreed, it is now defined in the introduction only.

## **2.15 [lines 97-103 Sentence is much too long. Please break up into separate sentences.]**

Response to 2.15

Agreed, it is now two sentences: “Section 2 presents the LDAS-Monde system, i.e. (i) the CO<sub>2</sub> responsive version of the ISBA LSM and the soil diffusion scheme, (ii) the CTRIP hydrological model and its coupling with ISBA, (iii) the atmospheric forcing used to drive the system, (iv) the equations of the SEKF and (v) the assimilated remotely sensed observations

dataset as well as the datasets used to assess the analysis impact. The latter is evaluated using agricultural statistics over France, river discharge, satellite-derived estimates of land transpiration and spatially gridded estimates of up-scaled gross primary production from the FLUXNET network.”

**2.16 [line 115 CTRIP should be defined.]**

Response to 2.16

CTRIP has already been defined in the introduction 1.94-96: “*Having a daily interactive coupling between ISBA and the CNRM (Centre National de Recherches Météorologiques) version of the TRIP (Total Runoff Integrating Pathways, Oki et al., 1998) river routing model (CTRIP hereafter)*”.

**2.17 [line 119 "detailed hereafter" should be "described in the following sections."]**

Response to 2.17

Agreed.

**2.18 [line 122 "They" what is it? Is it the model parameters in the previous sentence? Please be specific.]**

Response to 2.18

Agreed, “*ISBA models the basic land surface physics requiring only a small number of model parameters. They depend on the soil and vegetation types.*” Is now: “*ISBA models the basic land surface physics requiring only a small number of model parameters. The latter ones depend on the soil and vegetation types.*”

**2.19 [line 128-129 "net assimilation of CO<sub>2</sub>" Because the word assimilation is also used in the context of data assimilation, perhaps a different work could be used here? Like "uptake" or "intake"? I just think that using the word assimilation used in the 2 different contexts might confuse the readers.]**

Response to 2.19

Agreed, “*net assimilation of CO<sub>2</sub>*” has been replaced by “*CO<sub>2</sub> uptake*”.

**2.20 [line 132 "evaporation of"? Or should it read "evaporation due to (i) plant transpiration"?]**

Response to 2.20

Agreed, “*evaporation of*” is now “*evaporation due to*”.

**2.21 [line 140 What is "it"? Snow scheme or soil diffusion scheme?]**

Response to 2.21

It is now clarify: “*The multi-layer soil diffusion scheme version is based on the mixed form of the Richards’ equation (Richards, 1931) and explicitly solves the one-dimensional Fourier law. Additionally, it incorporates soil freezing processes developed by Boone et al. (2000) and Decharme et al. (2013).*” is now “*The multi-layer soil diffusion scheme version (ISBA-Dif) is based on the mixed form of the Richards’ equation (Richards, 1931) and explicitly solves the one-dimensional Fourier law. Additionally, ISBA-Dif incorporates soil freezing processes developed by Boone et al. (2000) and Decharme et al. (2013).*”

**2.22 [line 140 "Richard's " should be "Richards' " (apostrophe after the s) and you need a reference: Richards, L.A., 1931. Capillary conduction of liquids in porous mediums. Physics 1, 318 – 333]**

Response to 2.22

Agreed, reference to Richards, 1931 has now been added to the manuscript.

**2.23 [line 143 Need a reference for the Brooks and Corey model.]**

Response to 2.23

Agreed, the following reference has now been added to the revised version of the manuscript:

***Brooks, R. H., and A. T. Corey: Properties of porous media affecting fluid flow, J. Irrig. Drain. Div. Am. Soc. Civ. Eng., 17, 187–208, 1966.***

**2.24 [line 187 The LSM is represented by the letter M, but that is not used until eqn. 5. Perhaps better to name M closer to eqn. 5 in the text.]**

Response to 2.24

Authors prefer not to change this sentence as it is important to indicate at this stage that  $x$  is the control vector that represents the prognostic equations of the LSM  $M$ . If  $M$  is also mentioned close to Equation 5, it will be redundant.

**2.25 [line 237 Should "harmonies" be "harmonious"?)**

Response to 2.25

Authors thanks Reviewer #2 for pointing out this typo, it is now corrected.

**2.26 [line 297 Is "discharge" "river discharge"? If so please state this.]**

Response to 2.26

Agreed, it is now corrected.

**2.27 [line 307 "model ability" should be "model's ability"]**

Response to 2.27

Agreed, it is now corrected.

**2.28 [line 341-345 This is a long sentence and should be broken up. The last bit "...LAI (for SSM and LAI)." doesn't make sense to me, please clarify how LAI is for SSM and LAI? Please make sure that LAI is defined.]**

Response to 2.28

The considered sentence is now reduced and clarified, "*The LDAS used in this study is designed as follow;  $x$  is the 8-dimensional control vector including soil layers 2 to 8 (representing a depth from 1 cm of 100cm) and LAI propagated by ISBA LSM.  $y_o$  is the 2-dimensional observation vector (SSM, LAI) and the model counterparts of the observations are the second layer of soil of ISBA LSM ( $w_2$  between 1 and 4 cm) and LAI (for SSM and LAI).*" is now: "*The LDAS used in this study is designed as follow;  $x$  is the 8-dimensional control vector including soil layers 2 to 8 (representing a depth from 1 cm to 100cm) and LAI propagated by ISBA LSM.  $y_o$  is the 2-dimensional observation vector (SSM, LAI). The model counterparts of the observations are the second layer of soil of ISBA LSM ( $w_2$  between 1 and 4 cm) and LAI for SSM and LAI observations, respectively.*"

**2.29 [line 386 is also unclear with "data set is consistent over time" consistent with what exactly?]**

Response to 2.29

Please see Response to 2.12.

**2.30 [Section 3.3 title could be "Impact of the Analysis".]**

Response to 2.30

Agreed.

**2.31 [line 390 section 222 should be 2.2.2]**

Response to 2.31

Agreed.

**2.32 [Line 400. "Correlation (RMSD)" Please explain what RMSD is it the root mean square deviation, the difference or the sample standard deviation?]**

Response to 2.32

It is now clarify in the text. *“Over the same period, correlation (RMSD) between GEOV1 LAI and [...] is now “Over the same period, correlation and Root Mean Square Differences (RMSD) between GEOV1 LAI and SURFEX-CTIP LAI estimates is 0.75 and 0.85 m<sup>2</sup>m<sup>-2</sup>”*

**2.33 [line 411 "good values" is vague. Do you mean "high correlation values"?)]**

Response to 2.33

Agreed, *“Low correlations values are found in desert areas (over the Sahara), high elevation (e.g. over the Alps) and at high latitudes whereas good values [...] is now “Low correlations values are found in desert areas (over the Sahara), high elevation (e.g. over the Alps) and at high latitudes whereas high correlations values [...]”*

**2.34 [In the text, the differential terms such as delta (SSM)/ delta (LAI) are missing the superscript that is included in equation 9. Line 450 the lack of superscripts renders that term particularly unhelpful.]**

Response to 2.34

Agreed, it is now corrected in Table 2 and through the whole manuscript.

**2.35 [line 425 should be "higher than those" not higher compared to"]**

Response to 2.35

Agreed.

**2.36 [line 469 Should be "Jacobian's" not "Jacobians"]**

Response to 2.36

Agreed.

**2.37 [line 518 Where is "Eff." defined? I would change sentence to "greater than 0 and with 22 gauge stations reporting Eff greater than 0.5."]**



Response to 2.37

It is defined in section “2.2.4 Evaluation data sets and strategies”: “**Impact on  $Q$  is evaluated using correlation, RMSD as well as the efficiency score ( $Eff$ ) (Nash and Sutcliff, 1970).  $Eff$  evaluates the model’s ability to represent the monthly discharge dynamics and is given by:**

$$Eff = 1 - \frac{\sum_{mt=1}^T (Q_s^{mt} - Q_o^{mt})^2}{\sum_{mt=1}^T (Q_o^{mt} - \overline{Q_o^{mt}})^2} \quad (8)$$

where  $Q_s^t$  is the simulated river discharge (or analysed) at time  $t$  and  $Q_o^t$  is observed river discharge at month  $mt$ . The  $Eff$  can vary between  $-\infty$  and 1. A value of 1 corresponds to identical model predictions and observed data. A value of 0 implies that the model predictions have the same accuracy as the the mean of the observed data. Negative values indicate that the observed mean is a more accurate predictor than the model simulation.”

“Over 2000-2010, 48 of 83 gauge station present  $Eff$  values greater than 0, 22 greater than 0.5” is now “Over 2000-2010, 48 of 83 gauge station present  $Eff$  values greater than 0 and 22 gauge stations report  $Eff$  greater than 0.5”

2.38 [line 521 Change "superior" to "greater than" or use the mathematical symbol ">" in this paragraph.]

Response to 2.38

Agreed, “*superior*” is now “*greater than*”.

2.39 [line 521 Change to "(3 stations report a decrease > 0.05)"]

Response to 2.39

Agreed, “(3 present a decrease superior to 0.05)” is now “(3 stations report a decrease greater than 0.05)”

2.40 [line 532 Where is "open-loop" defined?]

Response to 2.40

It is defined in the introduction, L.80 “**However, the assimilation was not successful in improving the representation of river discharge within MODCOU compared to an open-loop (i.e. no assimilation) simulation.**”

For sake of clarity, it now is repeated in section 2.3 on experimental setup: “***SURFEX-CTRIIP was spun up by cycling twenty times through the year 1990, then a 10-yr model run is allowed before considering both an open-loop (a model run with no assimilation) and an analysis experiment over 2000-2012.***”

2.41 [Line 544 MTE needs to be defined.]

Response to 2.41

MTE is defined L.322-323, section 2.2.4 on Evaluation data sets and strategy: “**The up-scaled FLUXNET GPP and evapotranspiration were derived from the FLUXNET network using a model tree ensemble (FLUXNET-MTE hereafter) approach as described in Jung et al. (2009).**”

2.42 [Line 565 What is an "excessive Jacobian"?)

Response to 2.42

Wording is indeed not clear, by ‘excessive’ Authors meant ‘outliers’. It is now corrected (please see also Response to 2.43).

**2.43 [Line 567 What is "They"? and what is the "force-restore version" version of what?]**

Response to 2.43

For sake of clarity, “*They were however obtained using the force-restore version with three layers of soil.*” is now “*Those outliers in the Jacobian’s values were however obtained using the force-restore version of the ISBA LSM with three layers of soil and not with the diffusion soil scheme: ISBA-Dif.*”

**2.44 [Line 586 which "model" and what is "It" in "It that accounts for the texture-based..."]**

Response to 2.44

For sake of clarity, “*Soil moisture observations and background errors were scaled using the model dynamic range. It accounts for texture-based spatial variability in the error and assumes that the soil moisture errors and the dynamic range have a linear relationship.*” is now “*Soil moisture observations and background errors were scaled using the open-loop soil moisture dynamical range. The scaling accounts for texture-based spatial variability in the error and assumes that the soil moisture errors and the dynamic range have a linear relationship.*”

**2.45 [Line 577 " system too reliant on the chosen forcing" might be better.]**

Response to 2.45

Agreed, “*The SEKF is also limited in correcting errors from the atmospheric forcing uncertainty making the system relying too much on the chosen forcing.*” is now “*The SEKF is also limited in correcting errors from the atmospheric forcing uncertainty making the system too reliant on the chosen forcing.*”

**2.46 [Line 573 "they exhibit" what is they?]**

Response to 2.46

For sake of clarity, “*they*” is now “ $\frac{\partial SS M^t}{\partial w_{2-RZ}} \text{Jacobians}$ ”

**2.47 [Line 595 "elaborated methods" doesn’t make sense.]**

Response to 2.47

Agreed, “*elaborated*” is replaced by “*statistical*”

**2.48 [Line 601 Again the term from the Jacobian matrix is missing sub or superscripts.]**

Response to 2.48

Corrected here and through the whole manuscript.

**2.49 [Line 609 Should be "Can better use of" not "Can a better use of"]**

Response to 2.49

Agreed.

**2.50 [Line 630 "too large" could be better as "such large"]**

Response to 2.50

Agreed, “*too large*” is now “*such large*”

**2.51 [Line 643 "suggest an added value on vegetation variables" is unclear. how do these variables add value and what exactly is the value added?]**

Response to 2.51

For sake of clarity, “*Preliminary results from assimilating disaggregated LAI time series and using new LAI minimum values (not shown) suggest an added value on vegetation variables like above-ground biomass and on the representation of river discharge.*” is now “*Preliminary results from assimilating disaggregated LAI time series and using new LAI minimum values (not shown) suggest better representation of vegetation variables like LAI and above-ground biomass as well as an enhanced representation of river discharge compared to an open-loop simulation using the former LAI minimum values.*”

**2.52 [Line 652 should be "assimilating retrieved soil moisture"]**

Response to 2.52

Agreed, it is now corrected in the revised version of the manuscript: “*Despite the proven record of assimilating soil moisture retrieval from [...]*” is now “*Despite the proven record of assimilating retrieved soil moisture from [...]*”.

**2.53 [Line 655 "Tb" needs "b" as a subscript.]**

Response to 2.53

Agreed.

**2.54 [Line 666 Better to write "at Meteo-France; it will account for "]**

Response to 2.54

Agreed.

**2.55 [Table 1. Under "Model" what do DIF and NIT mean?]**

Response to 2.55

It is now clarify in the caption of Table 1, new caption is “*Summary of the experimental setup used in this study. “Dif” indicates that the diffusion scheme of the ISBA LSM is used, ‘NIT’ represents the biomass option selected.*”

**2.56 [Figure 1. typo "righth" should be "right"]**

Response to 2.56

Agreed, new caption is: “*Averaged (left) surface soil moisture from the Climate Change Initiative project of ESA (right) GEOVI Leaf Area Index from the Copernicus Global Land Service project (for pixels covered by more than 90% of vegetation) over 2000-2012.*”

**2.57 [Figure 2: What does the shaded area represent? Should explain in the caption. Need full stop at end of sentence.]**

Response to 2.57

The shaded area highlights the analysis impact for each considered metric: if the analysis is better than the open-loop then the area between the two lines (red and blue) is shaded in red and if the open-loop is better than the analysis then it is shaded in blue. However as the analysis is

systematically better than the open-loop there is no need to keep it and it is now remove from figure 2 (as well as from figure 14 now figure 15). Panels were also labelled and new caption is: “*Seasonal a) RMSD and b) correlation values between leaf area index (LAI) from the open-loop, analysis and GEOVI LAI estimates from the Copernicus Global Land Service project over 2000-2012.*” New figure 2 is presented below.

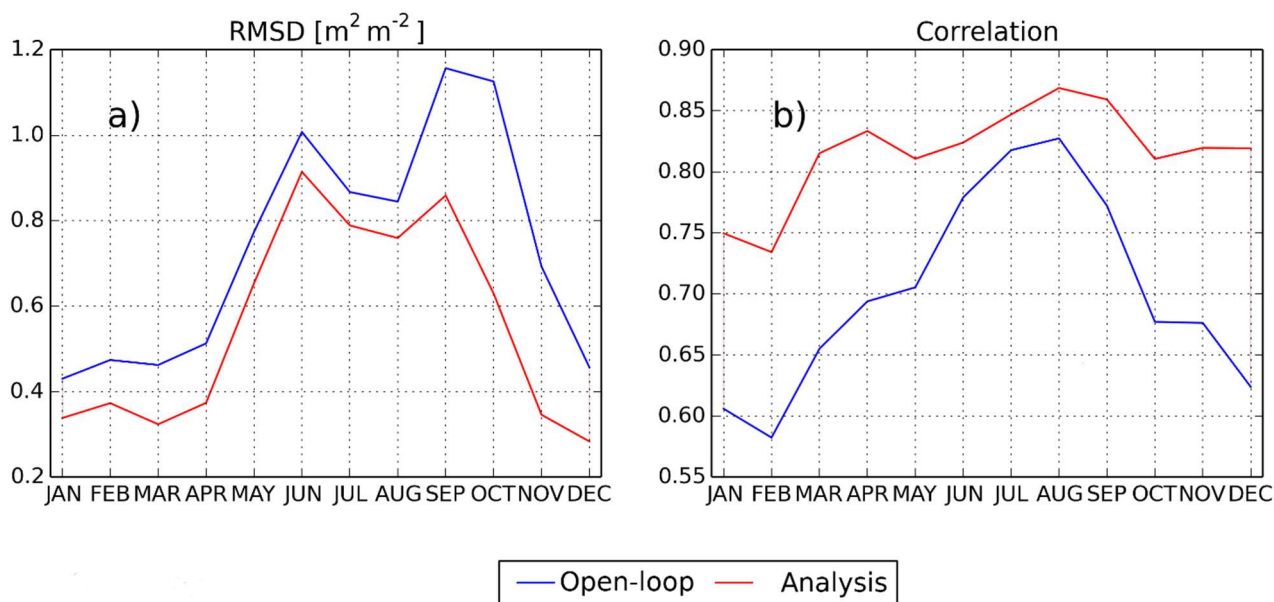

2.58 [Figure 3: The panels are very small. I think that all panels should be labeled a, b, c etc. and then referred to in the caption by letter. The top 6 panels appear to be for the median R values and the bottom is for a mean RMSD. This is not mentioned in the caption. What times are used in the creation of the median and mean? "Averaged values are reported..." which values are being averaged? In caption state that w<sub>2</sub> is the second layer of soil.]

Response to 2.58

Agreed, all panels are now labeled and referred to in the caption which is now : “*top row, yearly averaged correlations between satellite-derived surface soil moisture from the Climate Change Initiative project from ESA and the second layer of soil of SURFEX-CTRIP (w<sub>2</sub>: 1 cm-4 cm depth) for a) 2000, b) 2006 and c) 2012. d), e) and f) yearly averaged correlation between the GEOVI leaf area index from the Copernicus Global Land Service project and SURFEX-CTRIP for 2000, 2006 and 2012, respectively. g), h) and i) same as d), e) and f) for RMSD.*” New figure 3 is presented below.



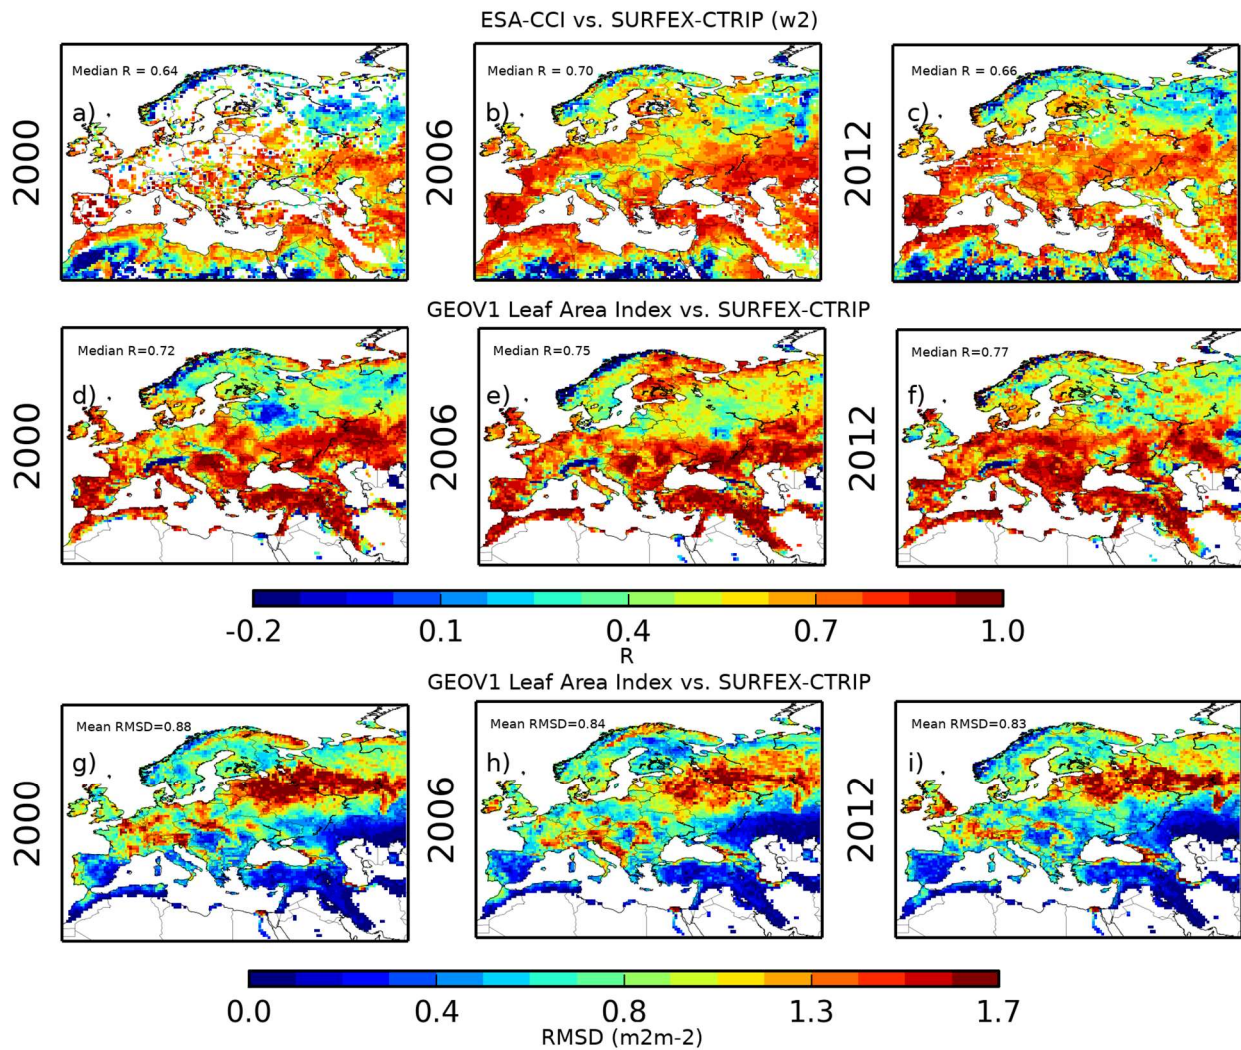

2.59 [Figure 4: Needs a label for the x axis. N is not defined in the caption but a number is given for N in each panel. The Jacobian elements need to match equation 9. There is a lack of superscript on the LAI variable. What are the solid blue lines in the histogram? Only the lines are defined in caption. Is there a vertical line drawn at 0.0? That should be stated because it is hard to see.]

Response to 2.59

Indeed information on N is missing, it represents the sampling. For sake of clarity on figure 4, the 90% confidence interval was chosen to define the upper and lower values to exclude outliers on the histograms. In agreement with Reviewer #2 comment, y-label is now 'Probability density', x-label is now 'Jacobians' and the Jacobian elements match equation 9 and all panels are labelled. New caption is: "*Jacobian values distribution: a) to f),  $\frac{\partial SS^t}{\partial w_2^0}$  (red line),  $\frac{\partial SSM^t}{\partial w_4^0}$  (cyan line) and  $\frac{\partial SSM^t}{\partial w_8^0}$  (blue line) all months of January, March, June, August, October and December over 2000-2012, g) to i),  $\frac{\partial LAI^t}{\partial LAI^0}$  (red line),  $\frac{\partial LAI^t}{\partial w_4^0}$  (cyan line) and  $\frac{\partial LAI^t}{\partial w_8^0}$  (blue line) for all months of January, June and October over 2000-2012. Black solid line represents a value of 0.*" New figure 4 is presented below.



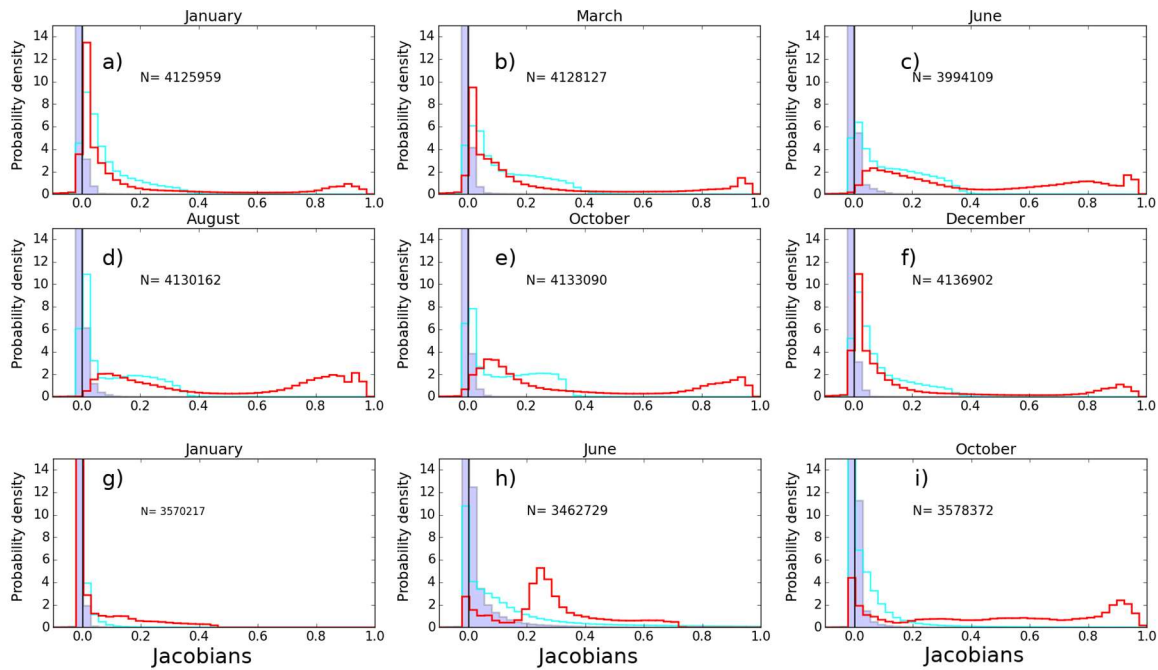

2.60 [Figure 5: State which column is which and which row is which. "Rows from top to bottom represent averaged analysis increments for all months Feb, May, Aug and Nov from 2000-2012...."]

Response to 2.60

Agreed, new caption is: "Rows from top to bottom represent averaged analysis increments for all months of February, May, August and November over 2000-2012. From left to right for 4 control variables are illustrated, leaf area index and soil moisture in the second ( $w_2$ , 1 cm- 4 cm), fourth ( $w_4$ , 10 cm-20 cm) and sixth ( $w_6$ , 40 cm – 60 cm) layer of soil, respectively."

2.61 [Figure 6: The y axis is not labeled correctly. It should be latitude not 200001-201212. If that is a year and month, it should be in the title or caption. Captial "S" needed. Change to "whole period 2000-2012".]

Response to 2.61

Agreed, 200001-201212 is now removed from the figure and the new caption is: "Averaged analysis increments for the whole period 2000-2012. Four control variables are illustrated: a) leaf area index and soil moisture in a) the second ( $w_2$ , 1 cm- 4 cm), b) fourth ( $w_4$ , 10 cm-20 cm) and c) sixth ( $w_6$ , 40 cm – 60 cm) layer of soil." New figure 6 is presented below.

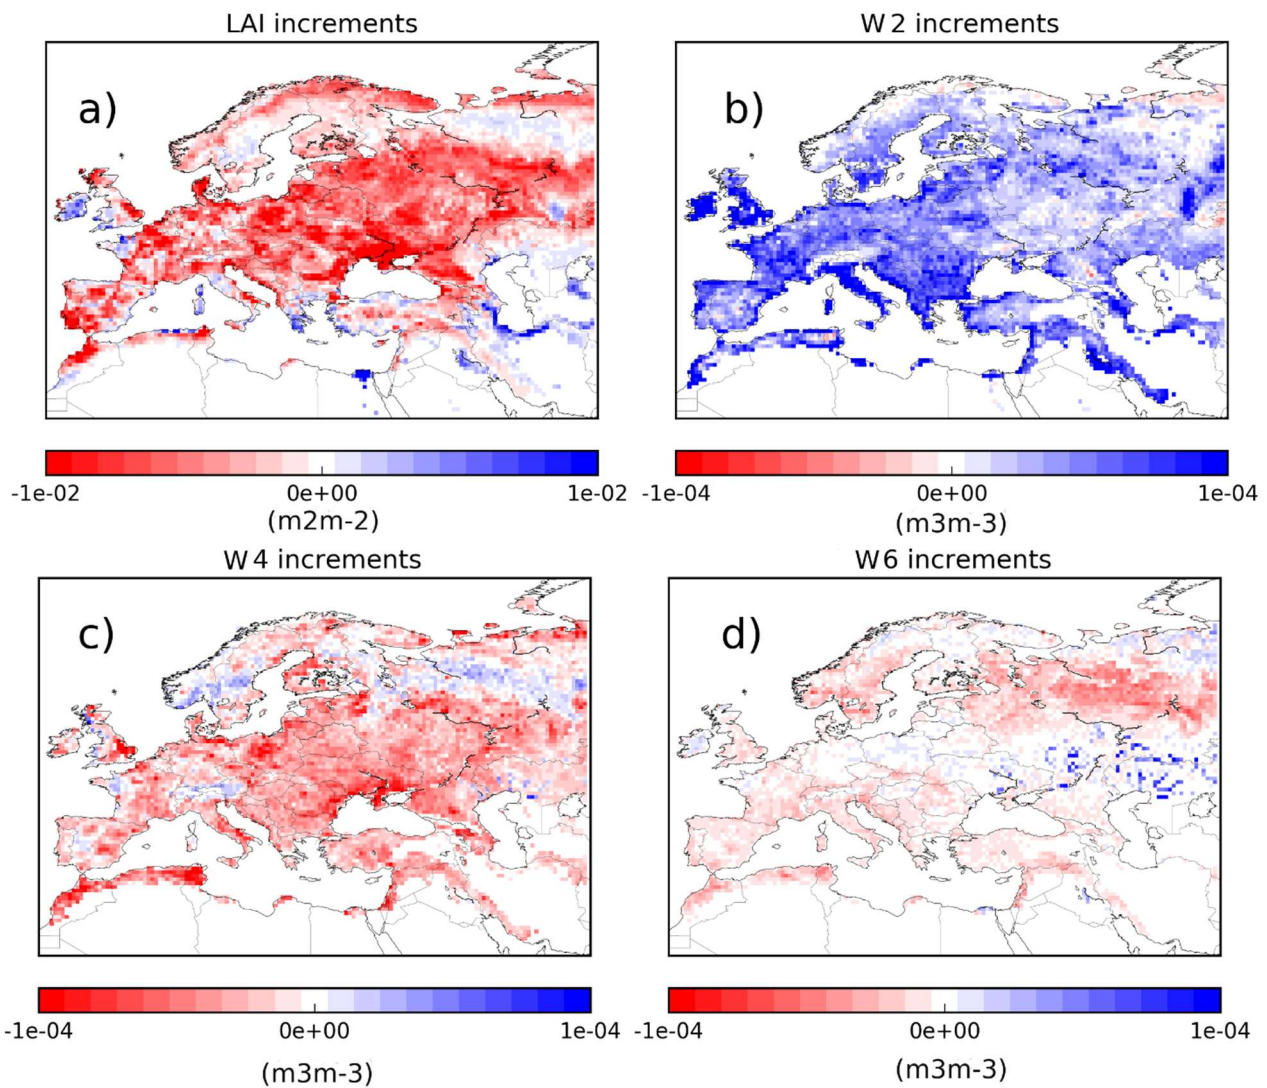

**2.62 [Figure 7: Panels need labels a, b,c and they need to be referenced as such in the panels.]**

Response to 2.62

Agreed, labels are now reported and all panels and captions has been changed accordingly: “*RMSD maps between leaf area index from the open-loop (analysis) and that from the Copernicus Global Land Service project (GEOV1 index) for a(b) January, e(f) April, c(d) July and e(f) October over 2000-2012.*” New figure 7 is presented below.

GEOV1 Leaf Area Index vs. SURFEX-CTRP

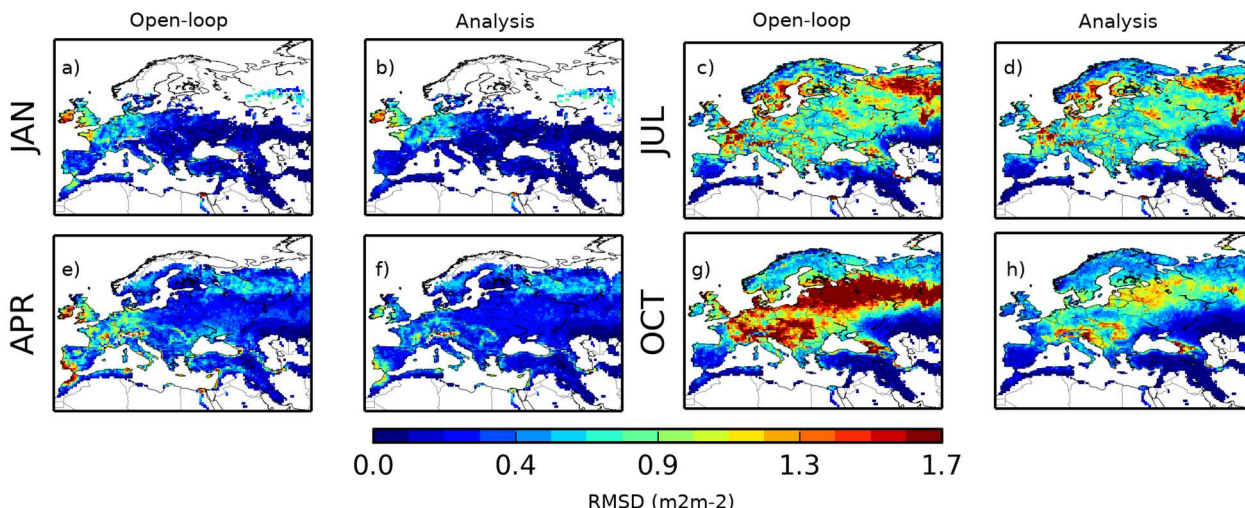

2.63 [Figure 8: What is N? You don't really need a legend for Red and Green on each of the 6 month plots. Just define in the caption. Panels need labels a, b,c and they need to be referenced as such in the panels. Label the x axis. y-axis is not a probability but a frequency of occurrence. Integral of the Probability function should be equal to one.]

Response to 2.63

Information on N is indeed missing, it represents the sampling which is reported on each month plots. In agreement with Reviewer #2 comment legend for Red and Green are only reported on the first plot, panels are labelled a, b, c...etc, x-axis is now 'Innovations or Residuals' and y-axis is 'Probability density' (please see also response to comment 2.6). New caption is: *“Probability density function of innovation (observations-open-loop in red) and residuals (observations – analysis, in green) for Leaf Area Index for a) February, b) April, c) June, d) August, e) October and f) December over 2000-2012. Sampling (N) is reported on each panel”*. New figure 8 is presented below.

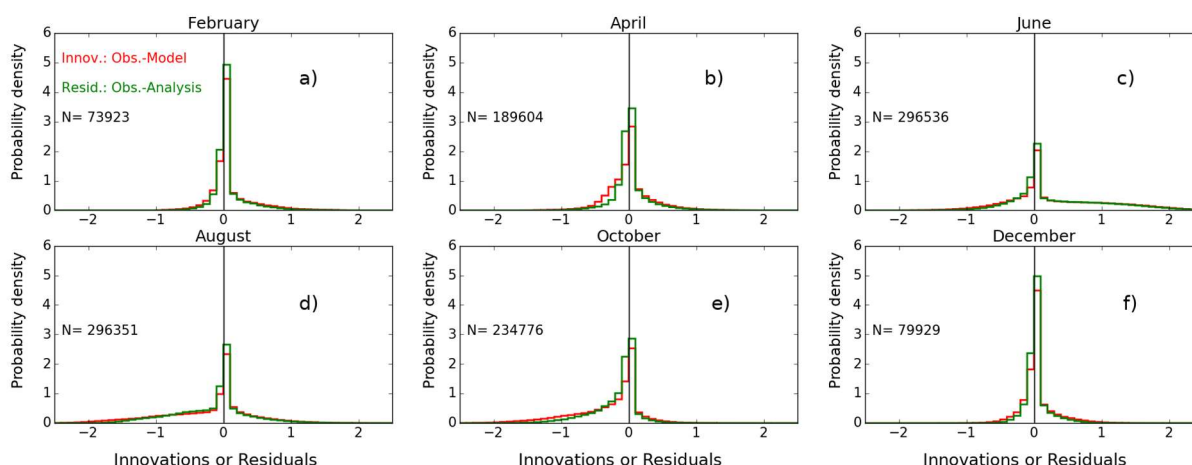

2.64 [Figure 9: Panels need labels a, b,c and they need to be referenced as such in the panels.]

Response to 2.64



Agreed, panels are now labeled and the new caption is: “*Averaged analysis impact on land surface variables that are indirectly affected over the period 2000-2012: a) drainage, b) runoff, c) evapotranspiration and d) river discharge.*” New figure 9 is presented below.

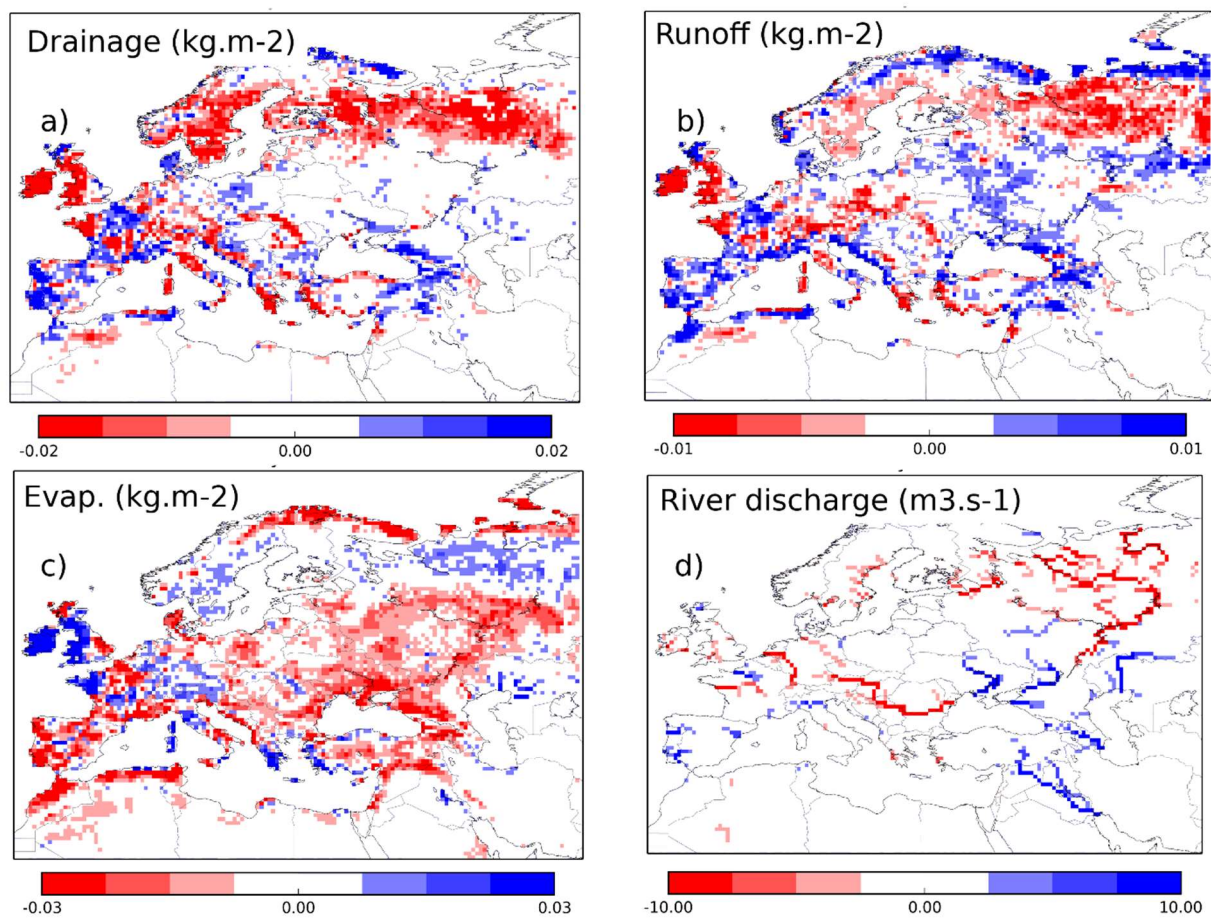

2.65 [Figure 10: In caption, please tell the reader what is Agreste?]

Response to 2.65

Agreed, new caption is: “*a); Correlation values for the above ground biomass from the open-loop with grain yields estimates from Agreste French agricultural statistics portal (<http://agreste.agriculture.gouv.fr>) over 45 sites in France plotted against correlations between the same quantities but above ground biomass from the analysis; b) same as a) for RMSD values; c) scaled anomalies time-series of above ground biomass from the open-loop (black dashed line) the analysis (black solid line) and grain yields observations (red solid) for one site in Allier, France (46.09N-3.21E).*”

2.66 [Figure 11: Panels need labels a, b,c and they need to be referenced as such in the panels. ]

Response to 2.66

Agreed, new labels a, b, c and d are reported on panels, also y-axis is now ‘Probability density’ for panels b to d (please see also Response to comment 2.6). New figure 11 is presented below.

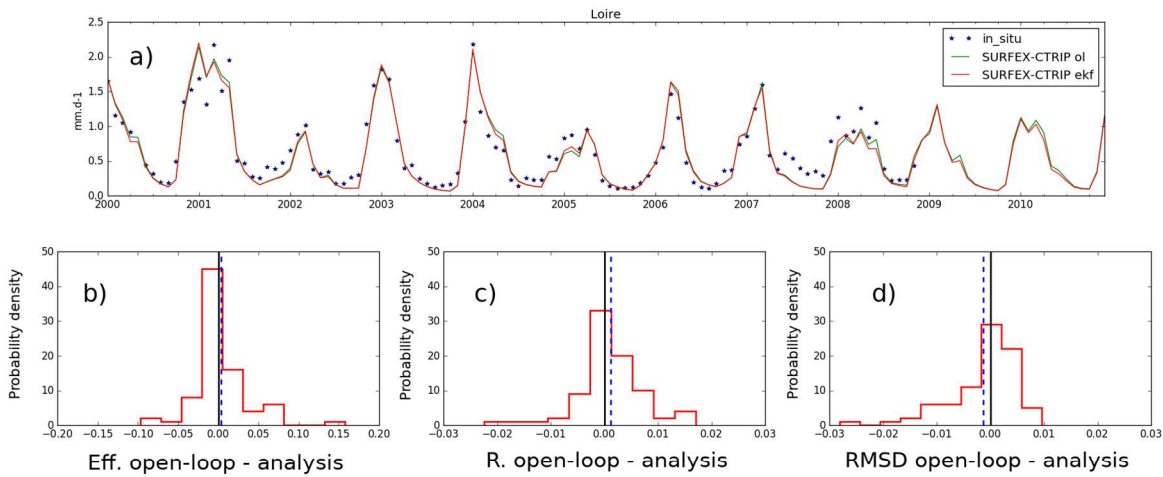

2.67 [Figure 12: The y axis is not labeled correctly. It should be latitude not 200001-201212. The multiple panels are very small and hard to see. I think that you could take the middle row and make it into a new figure. It is not about Evapotranspiration like the top and bottom rows. Please rewrite the second sentence. Be more explicit. For example: Maps of averaged taken over 2000-2012 of a) evapotranspiration...]

Response to 2.67

Agreed, y-label is removed and as suggested by Reviewer #2 this figure is now split into 2 figures, one for Evapotranspiration (new figure 12) and one for Gross Primary Production (new figure 13). It also makes them more visible for Readers. New captions and figures are:

***“Figure 12: Top row: maps of averaged evapotranspiration taken over 2000-2012 from a) the model (i.e open-loop), b) the GLEAM estimates, c) the analysis and d) differences between the analysis and model. Bottom row: maps of averaged evapotranspiration taken over 2000-2011 from a) the model (i.e open-loop), b) FLUXNET-MTE estimates, c) the analysis and d) differences between the analysis and model.”***



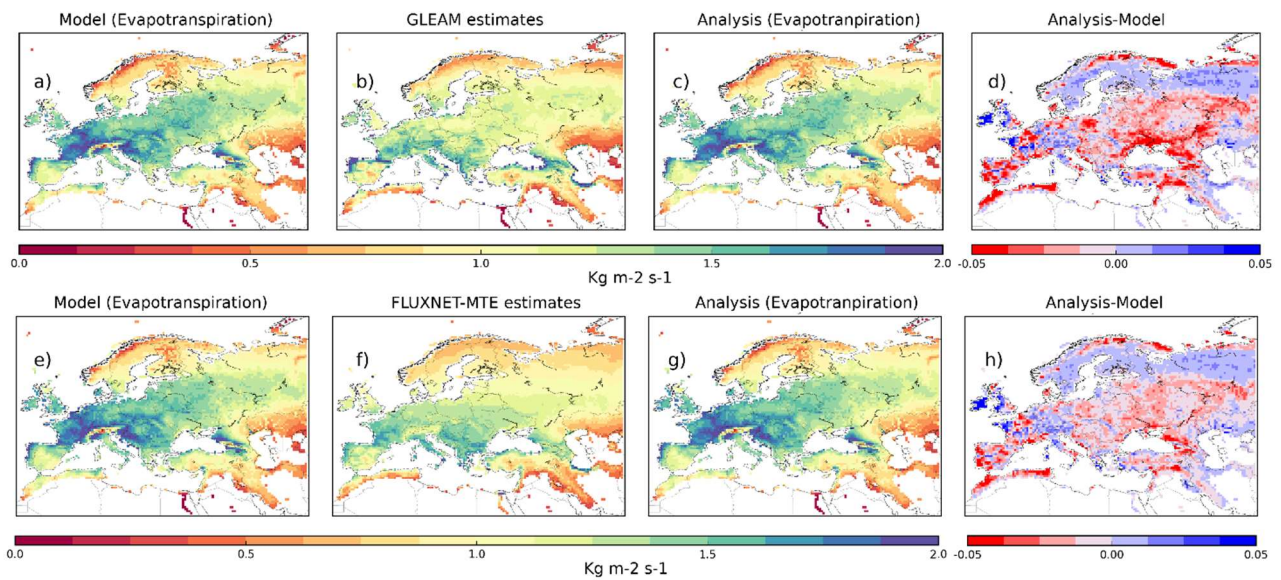

**Figure 13:** Maps of averaged Gross Primary Production taken over 2000-2011 from a) the model (i.e. open-loop), b) FLUXNET-MTE estimates, c) the analysis and d) differences between the analysis and model.”

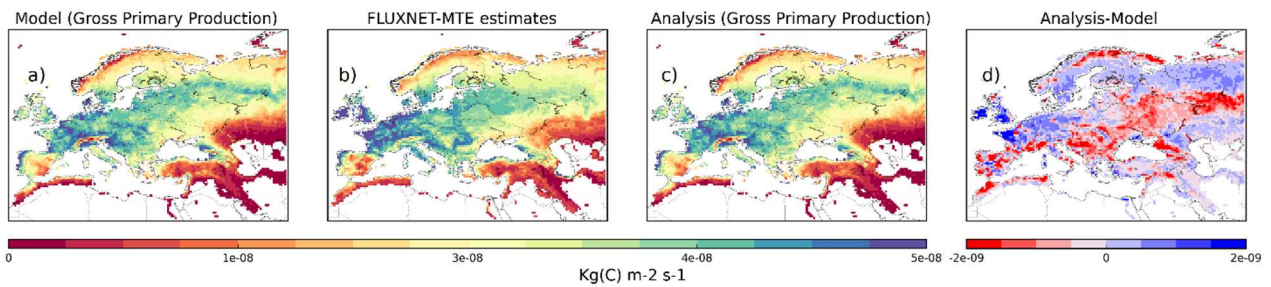

**2.68** [Figure 13: Rewrite caption. Use full stops. For example: RMSD (a) and correlations (b) between analysed (modelled) ....Panels c and d show Carbon... Panels e and f compare...]

Response to 2.68

Agreed, also figure 13 is now figure 14, the new caption is:

**RMSD (a) and Correlations (b) differences between analysed (modelled) evapotranspiration and GLEAM estimates over 2000-2012. c) and d) are similar to a) and b) for Carbon mass flux out of the atmosphere due to Gross Primary Production (GPP) from the analysis (model), and FLUXNET-MTE GPP estimates over 2000-2011. Finally e) and f) are similar to a) and b) for analysed (modelled) evapotranspiration and FLUXNET-MTE evapotranspiration estimates over 2000-2011.**

**2.68** [Figure 14: Panels need labels a, b,c and they need to be referenced as such in the panels. What is the observation dataset being used? What is the red shaded area? Rewrite: " Monthly RMSD and correlation values between...."]

Response to 2.69

Agreed, panels are now labelled and the red shaded areas has been removed. Figure 14 is now figure 15. The new caption is : “**Seasonal a) RMSD and b) correlation values between the Carbon**

mass flux out of the atmosphere due to Gross Primary Production on land (GPP) from the open-loop, analysis and FLUXNET-MTE estimates over 2000-2011.” New figure 15 is presented below.

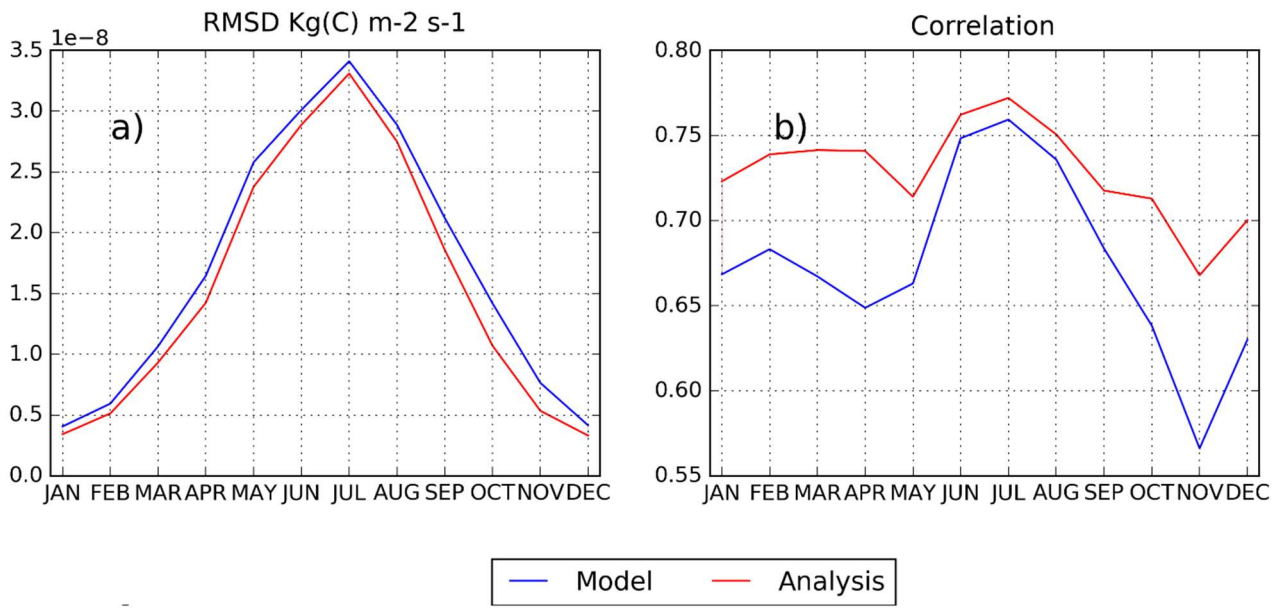

Supplement: Supplementary file [file gmd-2017-121-AC2-supplement.pdf]
